# Supplementary material
Source: PubMed Central journal article supplement (PMC3276468)
Supplement: supp_M017079_jlr.M017079-1.pdf [file supp_M017079_jlr.M017079-1.pdf]

## Supplementary Figure 1

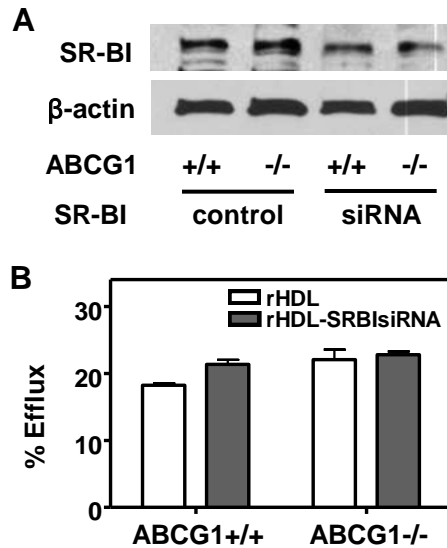

**ABCG1 does not contribute to cholesterol efflux to HDL in hepatocytes.** Freshly isolated mouse hepatocytes ( $7 \times 10^5$  cells) were transfected with 4  $\mu$ g plasmid of Mouse SR-BI shRNAmir and control non-silencing-GIPZ lentiviral shRNAmir as described under “Materials and Methods” and seeded in 12-well culture plates at  $3.5 \times 10^5$  cells per well. (A) Gene silencing efficiency was analyzed by Western Blotting following the incubations carried out to determine cholesterol efflux as described below. (B) After overnight culture, cells were labeled with 0.2  $\mu$ Ci/ml [ $^3$ H] cholesterol for 48 h. Cells were treated with T0901317 for 16 h. Following incubation with 20  $\mu$ g/ml rHDL for 16 h, radioactivity in the medium and cells was determined. Cholesterol efflux was calculated as the percentage of counts in the medium relative to the total counts in the medium and cells together. Values shown were the mean  $\pm$  SEM of triplicate determinations.
